# Supplementary material for: Blunt-ended DNA stacking interactions in a 3-helix motif
Source: Royal Society of Chemistry journal article supplement (doi:10.1039/c0cc01167c), 2010-01-01
Supplement: c0cc01167c.pdf [file c0cc01167c.pdf]

Supplementary Material (ESI) for Chemical Communications

## **Blunt-Ended DNA Stacking Interactions in a 3-Helix Motif**

Risheng Wang, Akinori Kuzuya, Wenyan Liu and Nadrian C. Seeman\*

### **Experimental Section:**

DNA strand sequences have been designed by using the program SEQUIN.<sup>1</sup> Biotin-modified oligonucleotides were synthesized on an Applied Biosystems 394 synthesizer, and other strands were purchased from Integrated DNA Technologies, Inc. (www.idtDNA.com); all DNA strands were purified by denaturing PAGE, eluted in a solution containing 500 mM ammonium acetate, 10 mM magnesium acetate, and 2 mM EDTA from gel, and precipitated by ethanol. Hydrogen bonded complexes were formed as described previously at a DNA concentration of 0.5  $\mu$ M,<sup>3</sup> complexes were analyzed on non-denaturing gels.<sup>3</sup> Atomic force microscopy was performed as described in ref 2 for Figure 3; ref 3 for Figure 4. DNA BTX arrays containing biotinylated oligonucleotides were annealed as described<sup>3</sup> above; the DNA complex: streptavidin ratio was 1:1. After adding streptavidin to the annealed DNA linear array, the solution was incubated overnight at 4°C before imaging.

### **References:**

- 1 N. C. Seeman, *J. Biomol. Str. & Dyns.*, 1990, **8**, 573.
- 2 A. Kuzuya, R. Wang, R. Sha and N. C. Seeman, *Nano Letters*, 2007, **7**, 1757.
- 3 R. Wang, W. Liu and N. C. Seeman, *Chemistry and Biology*, 2009, **16**, 862.

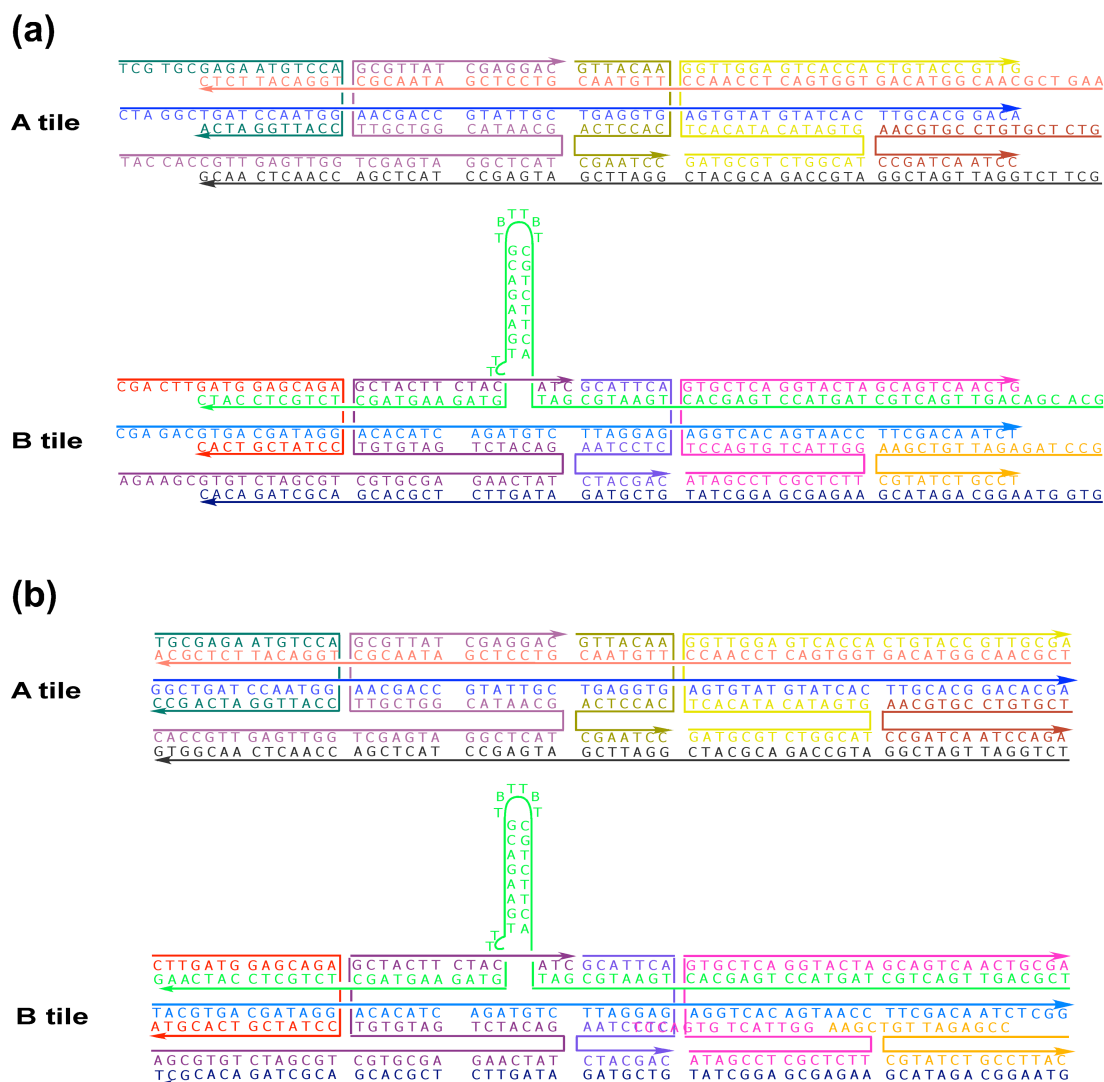

**Figure S1.** The sequences of the DNA BTX molecules used in this work. (a) shows the sticky-ended version, and (b) show the blunt-ended version. The strands are color-coded to match those in Figure 1. The B's in the loops represent biotin groups.

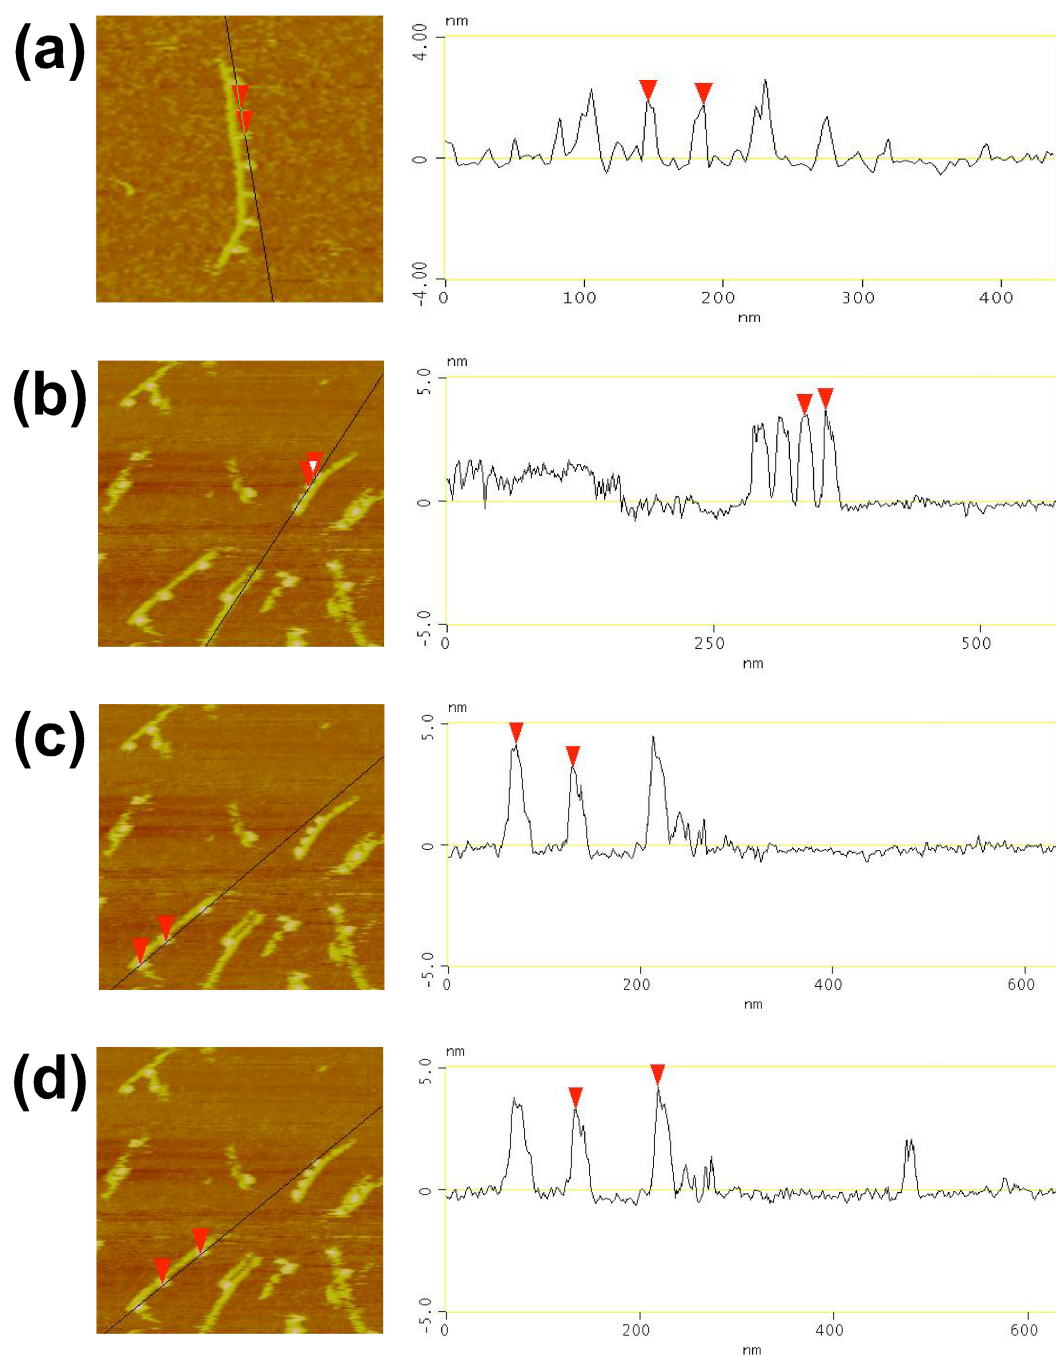

**Figure S2.** Cross section profile analysis of AFM images containing DNA BTX streptavidin linear arrays. (a) BTX AB tiles assembled with sticky ends; the distance is 39.75nm. (b), (c) and (d) BTX AB tile tiles assembled with blunt ends; the indicated spacings are 19.7 nm, 59.1 nm, and 84.6 nm, respectively. The dimensions of the AFM images the same size shown in Figures 3c and 3d.
